# Supplementary material for: Haploinsufficiency of the Myc regulator Mtbp extends survival and delays tumor development in aging mice
Source: PubMed Central journal article supplement (PMC5115908; doi:10.18632/aging.101092), 2016-10-30
Supplement: aging-08-2590-s001.pdf [file aging-08-2590-s001.pdf]

## SUPPLEMENTAL MATERIAL

### METHODS

#### Real Time PCR Primers

Cad-F – AACTGCGTAGGCTTCGACCATACA

Cad-R – AATCAATGCGGGTGAGCTCGTAGA

Gls [1]

Gls-F – TTCGCCCTCGGAGATCCTAC

Gls-R – CCAAGCTAGGTAACAGACCCT

Hk2 [2]

Hk2-F – TGATCGCCTGCTTATTCACGG

Hk2-R – AACCGCCTAGAAATCTCCAGA

Ncl-F – ACTGGAAAGACCAGCACTTGGAGT

Ncl-R – CCCTTTAGGTTTGCCATGTGGGT

Odc-F – GCATGTGGGTGATTGGATGCTGTT

Odc-R – TTGCCACATTGGCCGTGACATTAC

Pcg1a-F – GGATGAATACCGCAAAGAGC

Pcg1a-R – GGTAGGTGATGAAACCATAGC

Pcg1b [3]

Pcg1b-F – TCCTGTAAAAGCCCGGAGTAT

Pcg1b-R – GCTCTGGTAGGGGCAGTGA

Sirt1 [4]

Sirt1-F – ACCTCCCAGACCCTCAAGC

Sirt1-R – TTCCTTCCTTATCTGACAAAGC

### FIGURES

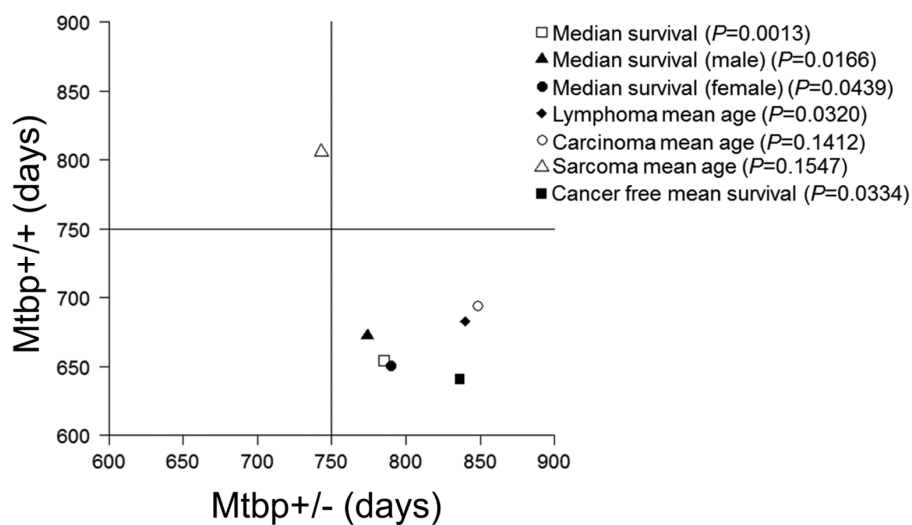

**Figure S1. Indicators of increased longevity in *Mtbp+/-* mice.** Ages of the events indicated in the key for *Mtbp+/-* mice compared to littermate matched *Mtbp+/-* mice plotted. P values determined by student's t-tests.

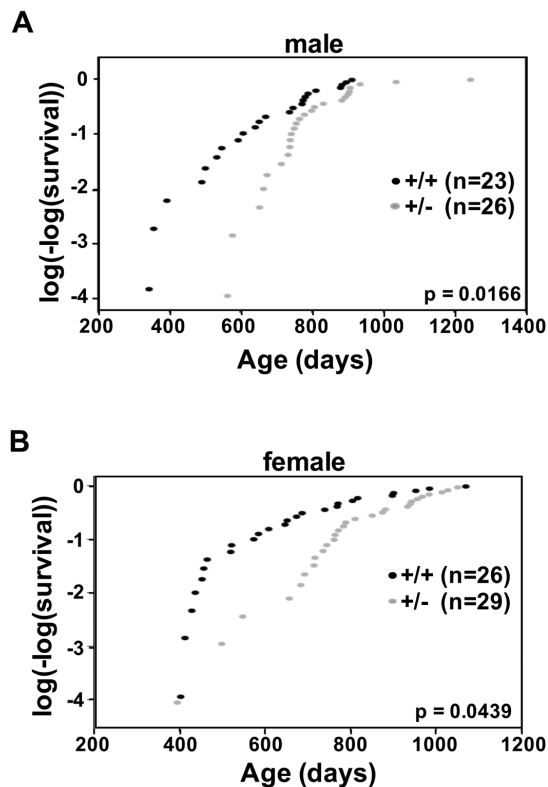

**Figure S2. Male and female *Mtbp* heterozygous mice have a decreased instantaneous death rate.** Instantaneous death rate plotted for males (A), log-rank  $P = 0.0166$ , Chi-sq=5.74, df=1) and females (B), log-rank  $P = 0.0439$ , Chi-sq=4.06, df=1). The number of mice in each group denoted by n.

## REFERENCES

- Hettmer S, Schinzel AC, Tchessalova D, Schneider M, Parker CL, Bronson RT, Richards NG, Hahn WC and Wagers AJ. Functional genomic screening reveals asparagines dependence as a metabolic vulnerability in sarcoma. *Elife*. 2015; 4.
- Shi LZ, Wang R, Huang G, Vogel P, Neale G, Green DR and Chi H. HIF1 $\alpha$ dependent glycolytic pathway orchestrates a metabolic checkpoint for the differentiation of TH17 and Treg cells. *J Exp Med*. 2011; 208: 1367-1376.
- Walkey CJ and Spiegelman BM. A functional peroxisome proliferator-activated receptor- $\gamma$  ligand-binding domain is not required for adipogenesis. *J Biol Chem*. 2008; 283: 24290-24294.
- Saini A, Al-Shanti N, Sharples AP and Stewart CE. Sirtuin 1 regulates skeletal myoblast survival and enhances differentiation in the presence of resveratrol. *Exp Physiol*. 2012; 97: 400-418.

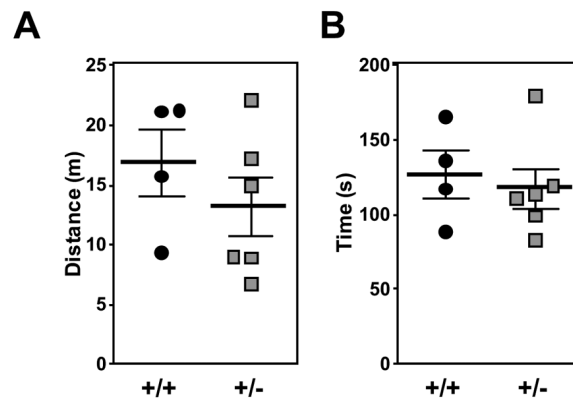

**Figure S3. *Mtbp* heterozygosity does not significantly alter locomotor activity in young mice.** (A) Six month-old *Mtbp*<sup>+/+</sup> (+/+; circle) and *Mtbp*<sup>+/-</sup> (+/-; square) mice were placed in an open field cage and the total distance traveled in one hour was recorded using a laser grid and averaged for two consecutive days ( $p = 0.1772$ ). (B) After two days of training, the time +/+ and +/- mice spent on an accelerating rotarod recorded and averaged from three consecutive trials separated by 10 minutes of rest ( $p=0.3359$ ). P values calculated with student's t-tests. Error bars represent standard error of the mean.
